# Supplementary material for: Experimental Manipulation of Grassland Plant Diversity Induces Complex Shifts in Aboveground Arthropod Diversity
Source: PubMed Central journal article supplement (PMC4747592; doi:10.1371/journal.pone.0148768), 2016-02-09
Supplement: pone.0148768.s002.pdf [file pone.0148768.s002.pdf]

Supporting Information File 2 for: Experimental manipulation of  
grassland plant diversity induces complex shifts in aboveground  
arthropod diversity

Lionel R. Hertzog, Sebastian T. Meyer, Wolfgang W. Weisser and Anne Ebeling

Table A: **Summary statistics, n=80 plots**

|                    | Abundance  |            | Richness   |            | Evenness   |            | Dominance  |            |
|--------------------|------------|------------|------------|------------|------------|------------|------------|------------|
|                    | Herbivores | Carnivores | Herbivores | Carnivores | Herbivores | Carnivores | Herbivores | Carnivores |
| Minimum            | 0.11       | 0.33       | 13         | 32         | 0.27       | 0.57       | 26         | 22         |
| Mean               | 0.36       | 0.85       | 24         | 41         | 0.72       | 0.73       | 53         | 49         |
| Maximum            | 1.46       | 1.72       | 45         | 57         | 0.89       | 0.85       | 93         | 68         |
| Standard deviation | 0.28       | 0.27       | 6.60       | 5.68       | 0.12       | 0.06       | 15.48      | 8.76       |

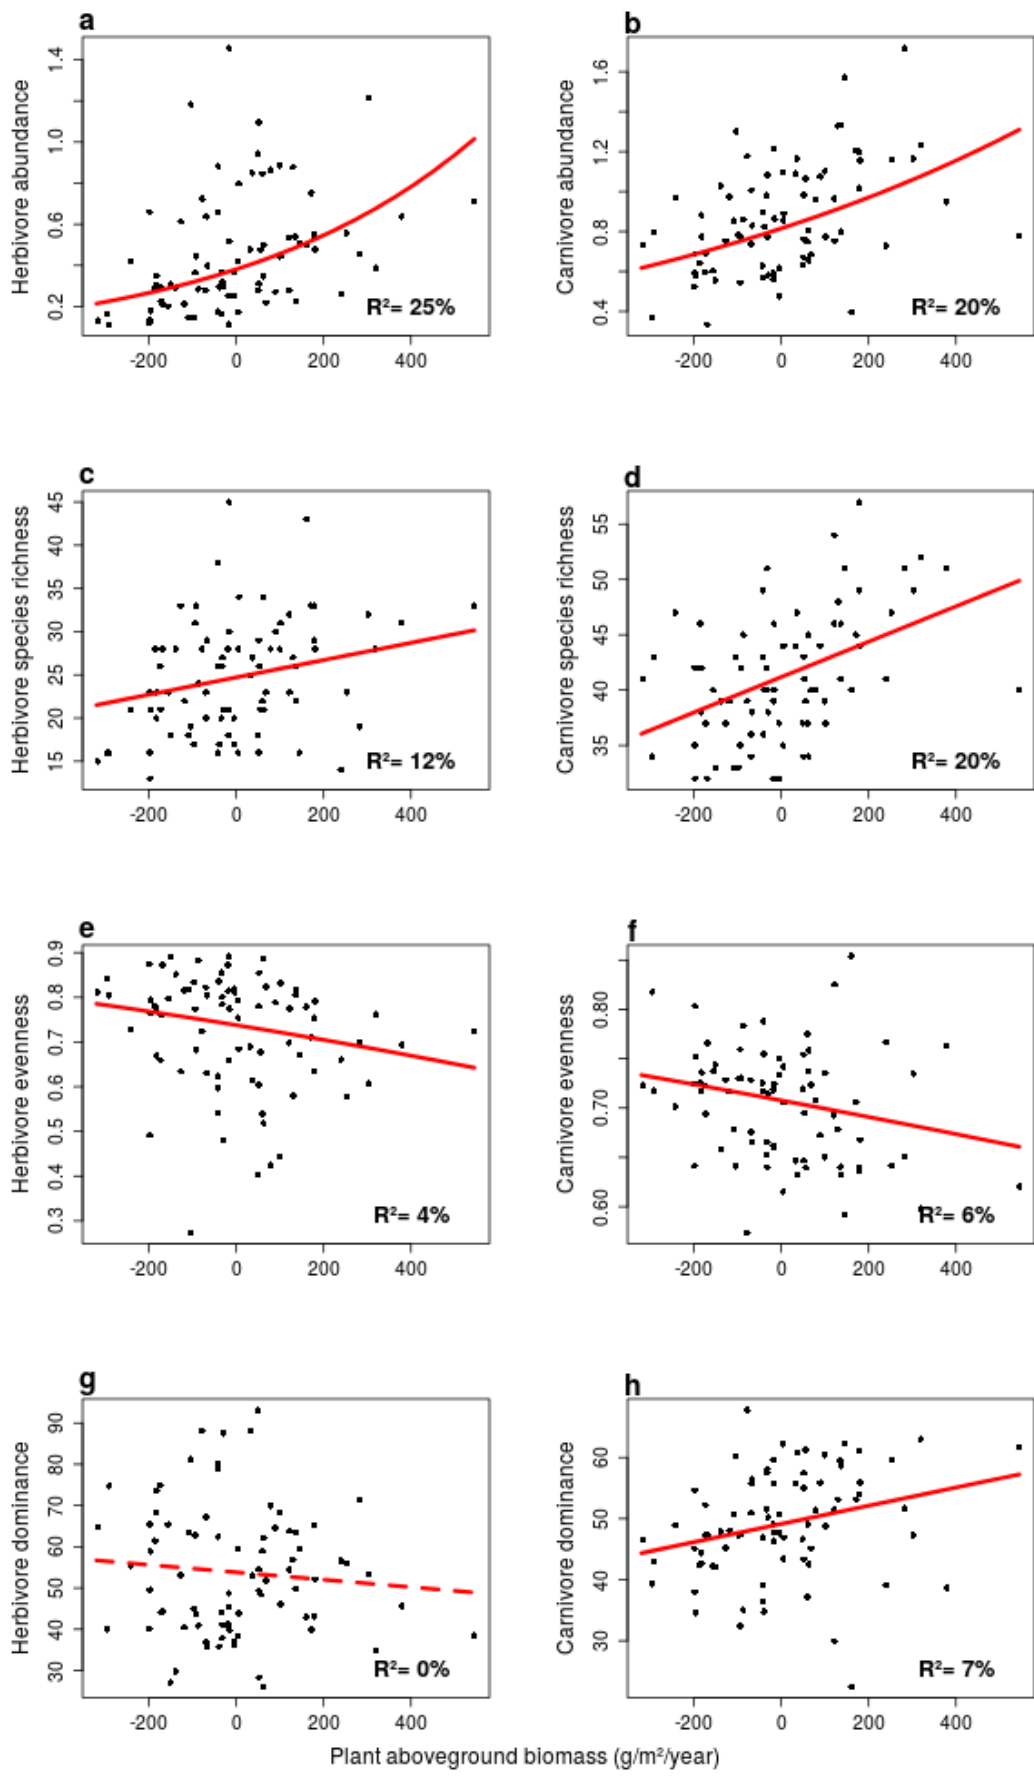

Figure A: **Relationship between the arthropod diversity indices and plant biomass (g/m<sup>2</sup>)**. Abundance (a and b), species richness (c and d), Shannon evenness (e and f) and dominance (g and h). All response variables were standardized by removing the block effect, i.e. by subtracting from each experimental unit (n=80) the average value in the block where the unit is. Abundance was log<sub>10</sub>-transformed and evenness logit-transformed. The lines show the fitted regression line, solid lines indicate significance of the diversity effect (p < 0.05). The R<sup>2</sup> value is taken from the linear regression.

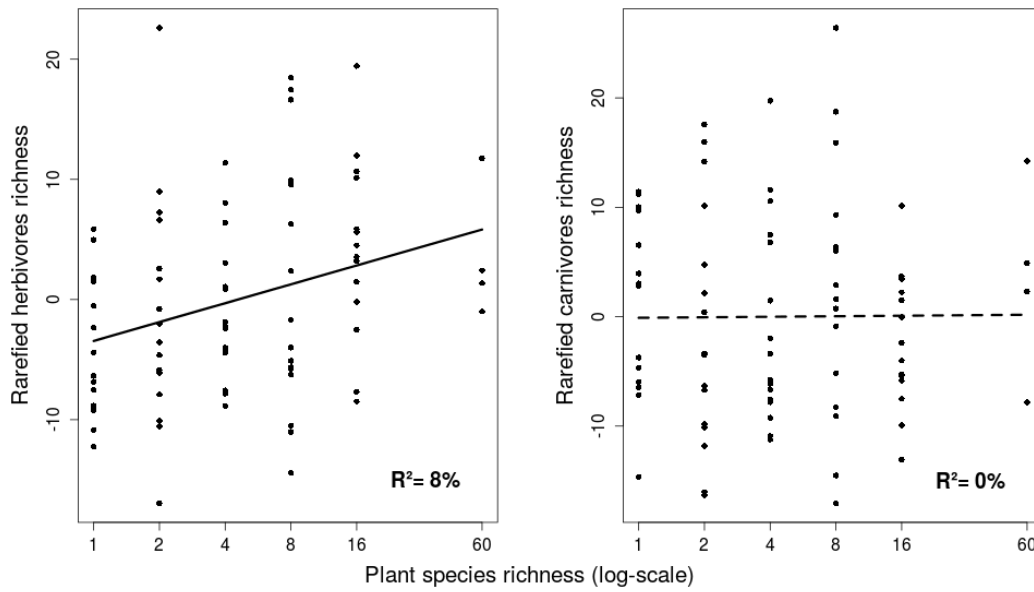

Figure B: **Relationship between rarefied species richness and plant species richness**, for herbivores (left panel) and carnivores (right panel). A thick line indicate a significant ( $p < 0.05$ ) slope. The  $R^2$  value of the linear regression is given.

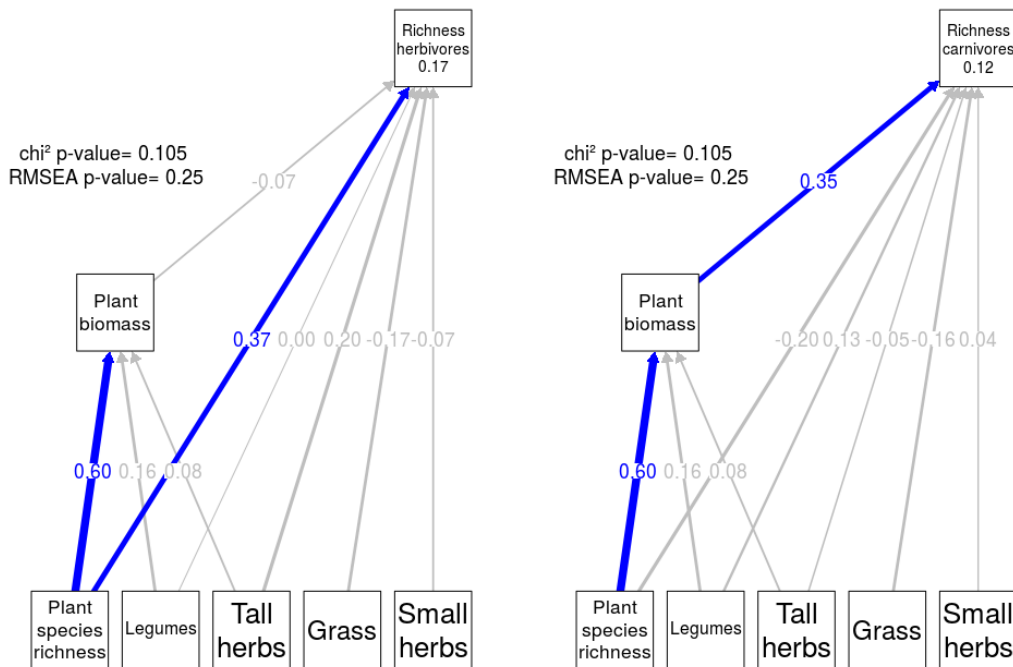

Figure C: **SEM models on the rarefied richness**, on the left side are the herbivores and on the right the carnivores, see the legend from Fig. 2 in the main text for further informations.
